# Supplementary material
Source: MDPI journal article supplement (https://www.mdpi.com/2311-5637/9/12/1004)
Supplement: s1 [file s1]

**Table S1.** Equipment capacity and cost

|                                      | Description                                                                                                                                                                    | Unit Cost (\$)    |
|--------------------------------------|--------------------------------------------------------------------------------------------------------------------------------------------------------------------------------|-------------------|
| Tray dryer (P-16/DDR-101)            | Dry the <i>S. horneri</i><br>Tray Area: 265.48 m <sup>2</sup>                                                                                                                  | 544,000           |
| Grinder (P-17/GR-101)                | Grind <i>S.horneri</i> to the powder<br>Sieve under the 200 mesh                                                                                                               | 466,000           |
| CHEF bioreactor (P18/R-101)          | Continuouse hydrolysis, enzymatic saccharification, and fermentation of bioethanol is conducted in the bioreactor<br>Bioreactor size: 50 m <sup>3</sup>                        | 2,658,000         |
| Steam generator (P20/SG-101)         | For electricity generation by using superheated steam for sterilization<br>Steam size: 26400 kg/hr                                                                             | 248,787           |
| Seed fermenter (P-3/SFR-102)         | Seed cultivation of <i>S.cerevisiae</i><br>Seed reactor size: 5 m <sup>3</sup>                                                                                                 | 636,000           |
| Centrifuge (P-7/DS-102)              | Separate biomass waste after fermentation<br>Throughput=3,000 L/h                                                                                                              | 250,500           |
| Storage tank (P-8/V-101)             | To hold the bioethanol before fillteration<br>Tank size: 30 m <sup>3</sup>                                                                                                     | 9,010             |
| Distillation column (P-11/C-101)     | To allow purification of ethanol up to 89% at top of the column and with less than 1% of ethanol content at bottom of the column (mostly water).<br>Size: D: 2.3 m, H: 13.12 m | 8,080,000         |
| Molecular sieve columns (P-12/C-102) | For dehydration of bioethanol by using ethylene glycol as a solvent<br>Size: D: 2.3 m, H: 10.60 m                                                                              | 3,892,000         |
| Cooler (P-13/PP102)                  | To cool down the bioethanol for storage.                                                                                                                                       | 24,300            |
| <b>Total</b>                         |                                                                                                                                                                                | <b>16,808,597</b> |

**Table S2.** Input material cost

| Raw materials                  | Cost (\$/kg)    |
|--------------------------------|-----------------|
| <i>S.horneri</i>               | 0               |
| water                          | 0.000482        |
| H <sub>2</sub> SO <sub>4</sub> | 0.07            |
| NaOH                           | 0.144           |
| Media                          | 0.81            |
| <i>S. cerevisiae</i> BY4741    | 0               |
| Cellic C Tec2                  | 1.62            |
| <b>Total</b>                   | <b>2.644482</b> |

**(a)Equipment cost**

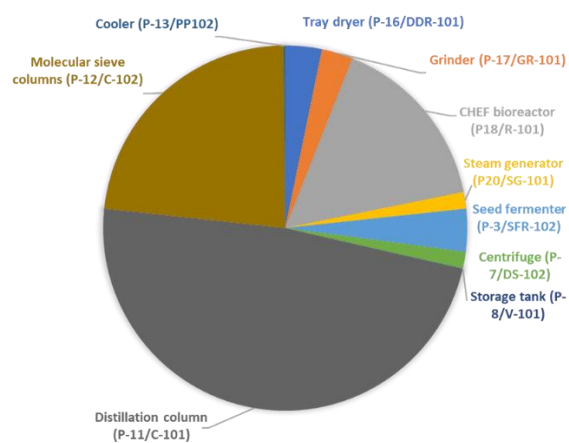

**(b)Raw material cost**

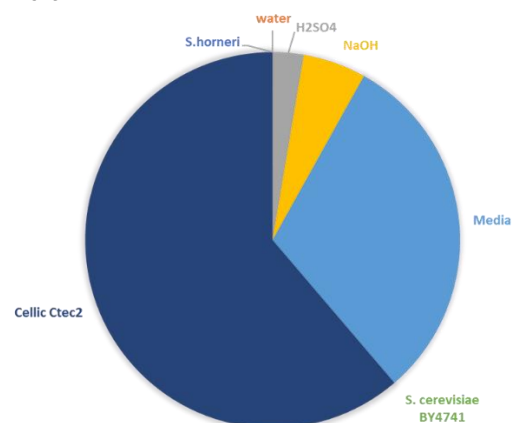

**Figure S1. Comparison of cost (a)Equipment cost (b)Raw material cost**
